# Supplementary material for: Complete nitrification: insights into the ecophysiology of comammox Nitrospira
Source: PubMed Central journal article supplement (PMC6311188; doi:10.1007/s00253-018-9486-3), 2018-11-10
Supplement: 253_2018_9486_MOESM1_ESM.pdf [file 253_2018_9486_MOESM1_ESM.pdf]

## **Supplementary material**

### **Journal:**

**Applied Microbiology and Biotechnology**

### **Title:**

**Complete nitrification: insights into the ecophysiology of comammox  
Nitrospira**

### **Authors:**

Hanna Koch, Maartje A. H. J. van Kessel, Sebastian Lücker\*

### **Affiliation:**

Department of Microbiology, Radboud University Nijmegen, The Netherlands

\*address correspondence to: Sebastian Lücker, [s.luecker@science.ru.nl](mailto:s.luecker@science.ru.nl)

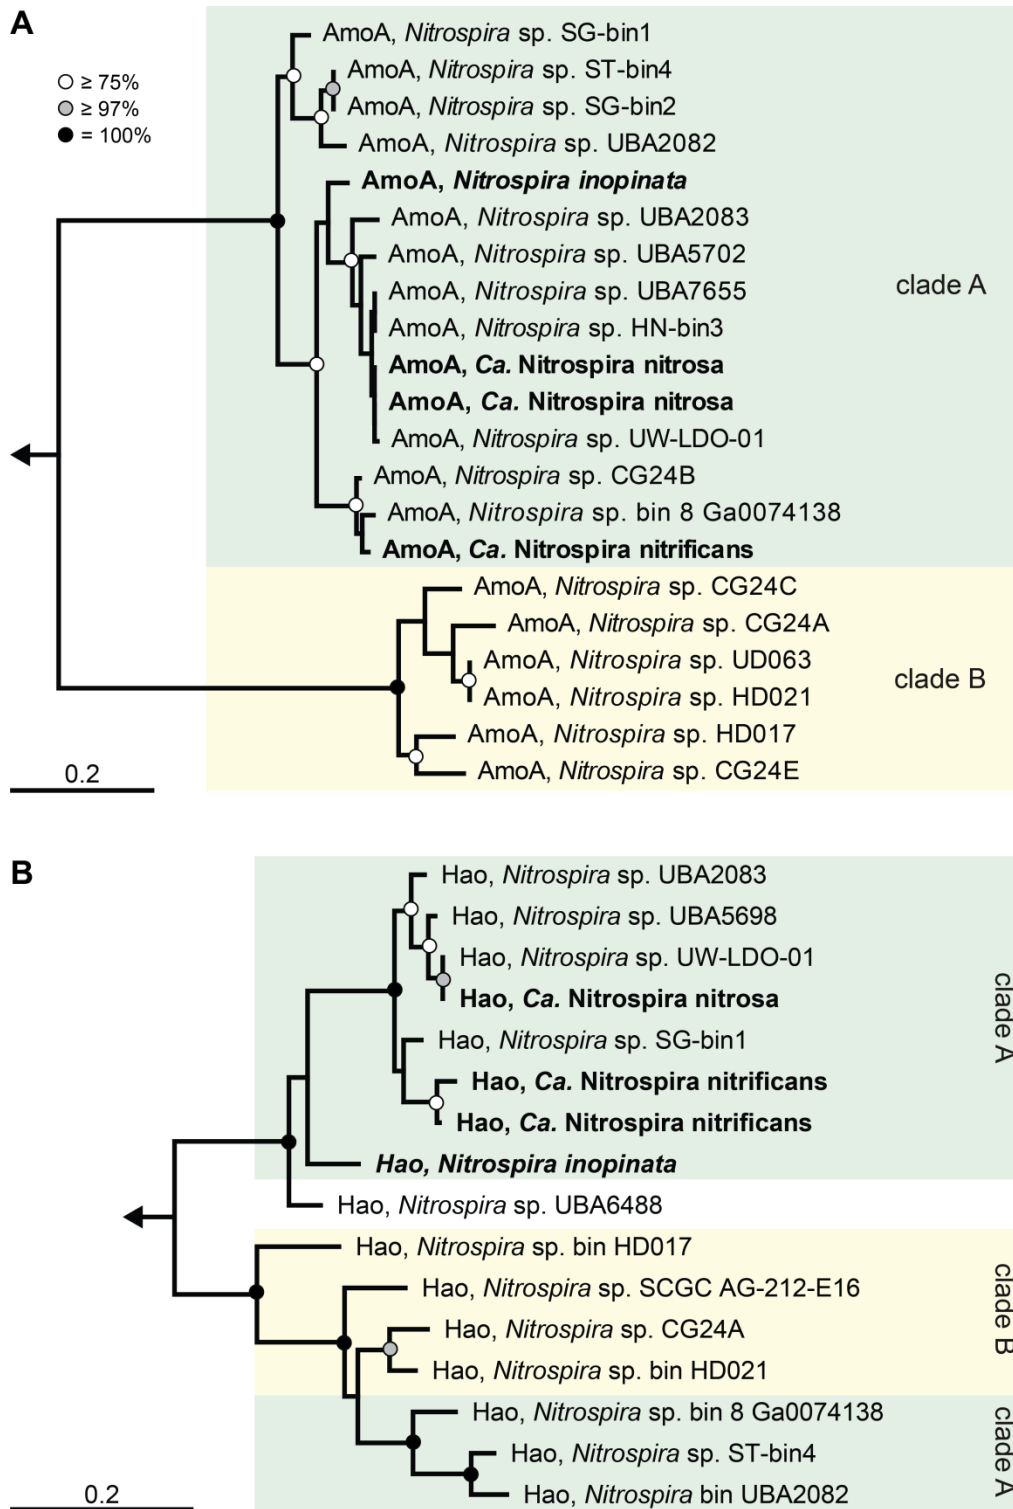

**Figure S1:** Comparison of (A) AmoA and (B) HaoA-based phylogeny of comammox *Nitrospira*. Protein sequences were aligned using Muscle (Edgar 2004) and maximum likelihood trees were calculated in Geneious (version 11.1.3) using PhyML (Guindon et al. 2009) with the WAG substitution model and 100 bootstrap iterations. Betaproteobacterial protein sequences were used to root the trees. The arrow indicates the position of the outgroup.

**Table S1:** Summary of key features of publicly available *Nitrospira* genomes in the NCBI database.

| Strain             | ccmABCDEF <sup>a</sup><br>(N.inopinata) <sup>b</sup> | HAO<br>(N.inopinata) | CycAB<br>(N.inopinata) | AmoABC<br>(N.inopinata) | NxrABC<br>(N.inopinata) | NrFAH<br>(N.inopinata) | NapA<br>(N.inopinata) | NirK<br>(N.inopinata) | Rh-type AMT<br>(N.inopinata) | AmtB-type AMT<br>(N.moscoviensis) | UreABCDFG<br>(N.inopinata) | UrtABCDE<br>(N.inopinata) | NirA<br>(N.lenta) | OCC<br>(N.moscoviensis) | NirC<br>(N.lenta) | NrtABD<br>(N.moscoviensis) | Cyanase<br>(N.moscoviensis) | Formate<br>dehydrogenase<br>(N.moscoviensis) | 3b [NiFe] hydrogenase<br>large subunit<br>(N.inopinata) | Comammox<br>clade | Nitrospira<br>lineage | Scaffolds <sup>c</sup>           | Environmental source <sup>e</sup> | CheckM -<br>completeness | Reference          |                  |
|--------------------|------------------------------------------------------|----------------------|------------------------|-------------------------|-------------------------|------------------------|-----------------------|-----------------------|------------------------------|-----------------------------------|----------------------------|---------------------------|-------------------|-------------------------|-------------------|----------------------------|-----------------------------|----------------------------------------------|---------------------------------------------------------|-------------------|-----------------------|----------------------------------|-----------------------------------|--------------------------|--------------------|------------------|
| N. sp. CG24A       | ABCDEF <sup>a</sup>                                  | AB                   | AB                     | ABC                     | BC                      |                        |                       | yes                   |                              | yes                               |                            | ABCDE                     |                   |                         |                   |                            | AB focA <sup>d</sup>        |                                              | B                                                       | 2                 | 58                    | DWTP                             | 87,22                             | Palomo et al. 2018       |                    |                  |
| N. sp. CG24B       | ABCDEF <sup>a</sup>                                  | AB                   | AB                     | ABC                     | BC                      |                        |                       | yes                   | yes                          |                                   | ABCDFG                     | AB                        |                   |                         |                   |                            |                             |                                              | A                                                       | 2                 | 36                    | DWTP                             | 92,22                             | Palomo et al. 2018       |                    |                  |
| N. sp. CG24C       | ABCDEF <sup>a</sup>                                  |                      |                        | ABC                     | BC                      |                        |                       | yes                   |                              | yes                               | ABCDFG                     | A                         |                   |                         |                   |                            | AB focA                     |                                              | B                                                       | 2                 | 28                    | DWTP                             | 93,05                             | Palomo et al. 2018       |                    |                  |
| N. sp. CG24D       | BCDEF <sup>a</sup>                                   |                      |                        |                         | ABC                     |                        |                       | yes                   |                              | yes                               |                            |                           | yes               |                         | ABD               | yes                        | ABG focA                    |                                              | B                                                       | 2                 | 135                   | DWTP                             | 92,17                             | Palomo et al. 2018       |                    |                  |
| N. sp. CG24E       | ABFGHI                                               |                      |                        | AB                      | ABC                     |                        |                       |                       |                              | yes                               | ABCDFG                     | BCDE                      |                   |                         |                   |                            | ABG focA                    |                                              | B                                                       | 2                 | 63                    | DWTP                             | 93,05                             | Palomo et al. 2018       |                    |                  |
| N. sp. HD017       | ABCDEF <sup>a</sup>                                  | AB                   | AB                     | ABC                     | C                       |                        |                       |                       |                              | yes                               | ABCDFG                     | ABD                       |                   |                         |                   |                            |                             |                                              | B                                                       | 2                 | 589                   | soil                             | 84,04                             | Orellana et al. 2018     |                    |                  |
| N. sp. HD021       | ABCDEF <sup>a</sup>                                  | AB                   | AB                     | ABC                     | ABC                     |                        |                       | yes                   |                              | yes                               | ABCDFG                     | ABCD                      |                   |                         |                   |                            | A                           |                                              | B                                                       | 2                 | 627                   | soil                             | 89,56                             | Orellana et al. 2018     |                    |                  |
| N. sp. HN-bin3     | CDEFGHI                                              | B                    | AB                     | AB                      | BC                      |                        |                       |                       | yes                          |                                   | ABCG                       |                           |                   |                         |                   |                            |                             | yes                                          | A                                                       | 2                 | 357                   | tap water China                  | 78,22                             | Wang et al. 2017         |                    |                  |
| N. defluviil       |                                                      |                      |                        |                         | ABC                     |                        |                       | yes                   |                              | yes                               |                            |                           | yes               |                         |                   |                            | AB focA                     |                                              | A                                                       | 2                 | 1                     | closed                           | WWTP                              | 97,67                    | Lücker et al. 2010 |                  |
| N. inopinata       | ABCDEF <sup>a</sup>                                  | AB                   | AB                     | ABC                     | ABC                     | AH                     | yes                   | yes                   | yes                          |                                   | ABCDFG                     | ABCDE                     |                   |                         |                   |                            |                             | yes                                          | A                                                       | 2                 | 2                     | closed                           | pipe biofilm                      | 96,82                    | Dalms et al. 2015  |                  |
| N. moscoviensis    |                                                      |                      |                        |                         | ABC                     | H                      |                       | yes                   |                              | yes                               | ABCDFG                     | A                         |                   | yes                     |                   | ABD                        | yes                         | ABG focA                                     |                                                         | A                 | 2                     | 2                                | closed                            | pipe heating system      | 95,91              | Koch et al. 2015 |
| Ca. N. nitrificans | ABCDEF <sup>a</sup>                                  | AB                   | AB                     | ABC                     | ABC                     |                        |                       | yes                   | yes                          |                                   | ABCDFG                     | ABCDE                     |                   |                         |                   |                            |                             | yes                                          | A                                                       | 2                 | 36                    | trickling filter aquaculture     | 96,76                             | van Kessel et al. 2015   |                    |                  |
| Ca. N. nitrosa     | ABCDEF <sup>a</sup>                                  | AB                   | AB                     | ABC                     | ABC                     |                        |                       | yes                   | yes                          |                                   | ABCDFG                     | ABCDE                     |                   |                         |                   |                            |                             | yes                                          | A                                                       | 2                 | 15                    | trickling filter aquaculture     | 96,76                             | van Kessel et al. 2015   |                    |                  |
| N. japonica        |                                                      |                      |                        |                         | ABC                     |                        |                       | yes                   |                              | yes                               | ABCG                       | ABCDE                     |                   | yes                     |                   | ABD                        | yes                         |                                              | A                                                       | 2                 | 2                     | closed                           | WWTP                              | 96,82                    | Ushiki et al. 2018 |                  |
| N. sp. ND1         |                                                      |                      |                        |                         | ABC                     | AH                     |                       | yes                   |                              | yes                               | ABCDFG                     | ABCDE                     | yes               |                         |                   |                            | AB focA                     |                                              | A                                                       | 2                 | 6                     | WWTP                             | 97,67                             | Ushiki et al. 2018       |                    |                  |
| N. sp. OLB3        |                                                      |                      |                        |                         | ABC                     |                        |                       | yes                   |                              | yes                               | ABCDFG                     | ABCDE                     | yes               | yes                     |                   |                            | ABG                         |                                              | A                                                       | 2                 | 79                    | WWTP                             | 91                                | Speth et al. 2016        |                    |                  |
| N. sp. SCGC        | ABCEFGHI                                             | AB                   | AB                     | BC                      | ABC                     |                        |                       | yes                   |                              |                                   |                            |                           |                   |                         |                   |                            | A focA                      |                                              | A                                                       | 2                 | 162                   | single cell; soil                | 52,67                             | GenBank: LSTC01000001.1  |                    |                  |
| N. sp. bin75       |                                                      |                      |                        |                         | ABC                     |                        |                       |                       |                              | yes                               |                            |                           |                   |                         |                   |                            |                             |                                              | A                                                       | 2                 | 115                   | marine sponge                    | 94,09                             | Slaby et al. 2017        |                    |                  |
| N. sp. SCN59-13    |                                                      |                      |                        |                         | C                       |                        |                       | yes                   |                              | yes                               | DFG                        | ABCDE                     | yes               |                         |                   |                            | AB focA                     |                                              | A                                                       | 2                 | 212                   | bioreactor                       | 35,96                             | Kantor et al. 2015       |                    |                  |
| N. sp. bin8        | ABCDEF <sup>a</sup>                                  | AB                   | AB                     | AB                      | C                       |                        |                       | yes                   | yes                          |                                   | ABCDFG                     | ABCDE                     |                   |                         |                   |                            |                             | yes                                          | A                                                       | 2                 | 61                    | DWTP                             | 87,67                             | Pinto et al. 2015        |                    |                  |
| N. sp. SG-bin1     | ABCDEF <sup>a</sup>                                  | AB                   | AB                     | ABC                     | ABC                     |                        |                       | yes                   | yes                          |                                   | ABCDFG                     |                           |                   |                         |                   |                            |                             | yes                                          | A                                                       | 2                 | 48                    | tap water Singapore              | 95,85                             | Wang et al. 2017         |                    |                  |
| N. sp. SG-bin2     | ABCEFGHI                                             |                      |                        | AB                      | ABC                     |                        |                       | yes                   | yes                          |                                   | ABCDFG                     | ABDE                      |                   |                         |                   |                            |                             | yes                                          | A                                                       | 2                 | 63                    | tap water Singapore              | 95,85                             | Wang et al. 2017         |                    |                  |
| N. sp. ST-bin4     | ABCDEF <sup>a</sup>                                  | A                    | AB                     | AB                      | AC                      |                        |                       | yes                   | yes                          |                                   | ABCDFG                     | DE                        |                   |                         |                   |                            |                             | yes                                          | A                                                       | 2                 | 117                   | tap water USA                    | 92,06                             | Wang et al. 2017         |                    |                  |
| N. sp. ST-bin5     |                                                      |                      |                        |                         | ABC                     | A                      |                       | yes                   |                              | yes                               |                            |                           | yes               |                         |                   |                            | AB focA                     |                                              | A                                                       | 2                 | 29                    | tap water USA                    | 91,82                             | Wang et al. 2017         |                    |                  |
| N. sp. UBA2082     | ABCDEF <sup>a</sup>                                  | A                    | AB                     | ABC                     | ABC                     |                        |                       | yes                   | yes                          |                                   | ABCDFG                     | ABCD                      | yes               |                         |                   |                            |                             | yes                                          | A                                                       | 2                 | 37                    | residential sediments after rain | 93,12                             | Parks et al. 2017        |                    |                  |
| N. sp. UBA2083     | AFGHI                                                | AB                   | AB                     | AB                      | BC                      |                        |                       | yes                   | yes                          |                                   | ABCDFG                     |                           |                   |                         |                   |                            |                             |                                              | A                                                       | 2                 | 137                   | residential sediments after rain | 87,32                             | Parks et al. 2017        |                    |                  |
| N. sp. UBA4129     |                                                      |                      |                        |                         | AC                      |                        |                       | yes                   |                              | yes                               |                            |                           |                   |                         |                   |                            | A focA                      |                                              | A                                                       | 2                 | 376                   | WWTP                             | 80,75                             | Parks et al. 2017        |                    |                  |
| N. sp. UBA5698     | ABCDEF <sup>a</sup>                                  | AB                   | AB                     |                         | ABC                     |                        |                       | yes                   | yes                          | yes                               | ABCDFG                     | ABCD                      |                   |                         |                   |                            |                             | yes                                          | A                                                       | 2                 | 73                    | industrial sediments after rain  | 95                                | Parks et al. 2017        |                    |                  |
| N. sp. UBA5699     | BCDEF <sup>a</sup>                                   |                      |                        |                         | C                       |                        |                       | yes                   |                              | yes                               | ABCDFG                     | ABCDE                     | yes               | yes                     |                   | ABD                        | yes                         |                                              | A                                                       | 2                 | 124                   | industrial sediments after rain  | 90,3                              | Parks et al. 2017        |                    |                  |
| N. sp. UBA5702     | ABCDEF <sup>a</sup>                                  |                      | AB                     | AB                      | ABC                     |                        |                       | yes                   | yes                          |                                   | ABCDFG                     | ABCDE                     |                   |                         |                   |                            |                             | yes                                          | A                                                       | 2                 | 109                   | industrial sediments after rain  | 94,09                             | Parks et al. 2017        |                    |                  |
| N. sp. UBA6488     | BCDEF <sup>a</sup>                                   | A                    |                        |                         | BC                      |                        |                       | yes                   |                              | yes                               |                            | A                         | yes               |                         |                   |                            |                             | yes                                          | A                                                       | 2                 | 95                    | river estuary                    | 82,23                             | Parks et al. 2017        |                    |                  |
| N. sp. UBA6493     | BCDEF <sup>a</sup>                                   |                      |                        |                         | C                       |                        |                       | yes                   |                              | yes                               |                            |                           | yes               |                         |                   |                            |                             | yes                                          | A                                                       | 2                 | 52                    | river estuary                    | 81,58                             | Parks et al. 2017        |                    |                  |
| N. sp. UBA667      |                                                      |                      |                        |                         | BC                      | AH                     |                       | yes                   |                              | yes                               |                            |                           |                   |                         |                   |                            | B focA                      |                                              | A                                                       | 2                 | 376                   | WWTP                             | 76,94                             | Parks et al. 2017        |                    |                  |
| N. sp. UBA6909     | ABCDEF <sup>a</sup>                                  | AB                   | AB                     |                         | ABC                     | yes                    |                       | yes                   | yes                          |                                   | ABCDFG                     | A                         |                   |                         |                   |                            |                             |                                              | A                                                       | 2                 | 275                   | river estuary                    | 86,53                             | Parks et al. 2017        |                    |                  |
| N. sp. UBA7240     |                                                      |                      |                        |                         | C                       | AH                     |                       | yes                   |                              |                                   |                            |                           | yes               |                         |                   |                            | AB focA                     |                                              | A                                                       | 2                 | 412                   | WWTP (anoxic tank)               | 69,12                             | Parks et al. 2017        |                    |                  |
| N. sp. UBA7655     | ABCDEF <sup>a</sup>                                  |                      | B                      | AB                      | ABC                     |                        |                       | yes                   | yes                          |                                   | ABCDFG                     |                           |                   |                         |                   |                            |                             | yes                                          | A                                                       | 2                 | 132                   | DWTP                             | 78,07                             | Parks et al. 2017        |                    |                  |
| N. sp. UD063       | ABEH                                                 |                      | AB                     | ABC                     | BC                      |                        |                       | yes                   |                              | yes                               | ABCDG                      | ABCD                      |                   |                         |                   |                            | AB focA                     |                                              | B                                                       | 2                 | 1453                  | soil                             | 91,16                             | Orellana et al. 2018     |                    |                  |
| N. sp. UW-LDO-01   | ABCDEF <sup>a</sup>                                  | AB                   | AB                     | AB                      | AC                      |                        |                       | yes                   | yes                          |                                   | ABCDFG                     | ABCDE                     |                   |                         |                   |                            |                             | yes                                          | A                                                       | 2                 | 230                   | lab-scale bioreactor             | 95,8                              | Camejo et al. 2017       |                    |                  |
| N. sp. UW-LDO-02   |                                                      |                      |                        |                         | AC                      | AH                     |                       | yes                   |                              | yes                               |                            |                           | yes               |                         |                   |                            | AB focA                     |                                              | A                                                       | 2                 | 522                   | lab-scale bioreactor             | 94,36                             | Camejo et al. 2017       |                    |                  |

<sup>a</sup> AmoABC, ammonia monooxygenase; AMT, ammonium transporter; CCM, cytochrome c-biosynthesis proteins; CycAB, cytochromes c554 and cM552; HAO, hydroxylamine dehydrogenase; Nap, periplasmic nitrate reductase; NirA, ferredoxin-dependent nitrite reductase; NirC, nitrite transporter;

NirK, copper-dependent nitrite reductase; NrFAH, pentaheme nitrite reductase; NrtABC, nitrate ABC-type transporter; Nxr, nitrite oxidoreductase; OCC, octaheme cytochrome c; UreABCDFG, urease and urease accessory proteins; UrtABCDE, urea ABC-type transporter.

<sup>b</sup> Homologous proteins were identified using BLASTp (Altschul et al. 1990). Only hits with >50% identity and >50% query coverage were considered as homologs. *Nitrospira* species used as query are indicated in brackets.

<sup>c</sup> number of scaffolds according to NCBI

<sup>d</sup> focA: Formate transporter

<sup>e</sup> DWTP, drinking water treatment plant; WWTP, wastewater treatment plant

## References

- Altschul SF, Gish W, Miller W, Myers EW, Lipman DJ (1990) Basic local alignment search tool. *J Mol Biol* 215(3):403–410. [https://doi.org/10.1016/S0022-2836\(05\)80360-2](https://doi.org/10.1016/S0022-2836(05)80360-2)
- Camejo PY, Domingo JS, McMahon KD, Noguera DR (2017) Genome-enabled insights into the ecophysiology of the comammox bacterium “*Candidatus Nitrospira nitrosa*”. *mSystems* 2(5):16. <https://doi.org/10.1128/mSystems.00059-17>
- Daims H, Lebedeva EV, Pjevac P, Han P, Herbold C, Albertsen M, Jehmlich N, Palatinszky M, Vierheilig J, Bulaev A, Kirkegaard RH, von Bergen M, Rattei T, Bendinger B, Nielsen PH, Wagner M (2015) Complete nitrification by *Nitrospira* bacteria. *Nature* 528(7583):504–509. <https://doi.org/10.1038/nature16461>
- Edgar RC (2004) MUSCLE: multiple sequence alignment with high accuracy and high throughput. *Nucleic Acids Res* 32(5):1792–1797. <https://doi.org/10.1093/nar/gkh340>
- Guindon S, Delsuc F, Dufayard J-F, Gascuel O (2009) Estimating maximum likelihood phylogenies with PhyML. In: Posada D (ed) *Bioinformatics for DNA sequence analysis*. Humana Press, Totowa, NJ, pp 113–137
- Kantor RS, van Zyl AW, van Hille RP, Thomas BC, Harrison STL, Banfield JF (2015) Bioreactor microbial ecosystems for thiocyanate and cyanide degradation unravelled with genome-resolved metagenomics. *Environ Microbiol* 17(12):4929–4941. <https://doi.org/10.1111/1462-2920.12936>
- Koch H, Lückner S, Albertsen M, Kitzinger K, Herbold C, Spieck E, Nielsen PH, Wagner M, Daims H (2015) Expanded metabolic versatility of ubiquitous nitrite-oxidizing bacteria from the genus *Nitrospira*. *Proc Natl Acad Sci U S A* 112(36):11371–11376. <https://doi.org/10.1073/pnas.1506533112>
- Lückner S, Wagner M, Maixner F, Pelletier E, Koch H, Vacherie B, Rattei T, Damste JSS, Spieck E, Le Paslier D, Daims H (2010) A *Nitrospira* metagenome illuminates the physiology and evolution of globally important nitrite-oxidizing bacteria. *Proc Natl Acad Sci U S A* 107(30):13479–13484. <https://doi.org/10.1073/pnas.1003860107>
- Orellana LH, Chee-Sanford JC, Sanford RA, Löffler FE, Konstantinidis KT (2018) Year-round shotgun metagenomes reveal stable microbial communities in agricultural soils and novel ammonia oxidizers responding to fertilization. *Appl Environ Microbiol* 84(2):14. <https://doi.org/10.1128/aem.01646-17>
- Palomo A, Pedersen AG, Fowler SJ, Dechesne A, Sicheritz-Pontén T, Smets BF (2018) Comparative genomics sheds light on niche differentiation and the evolutionary history of comammox *Nitrospira*. *Isme J* 12(7):1779–1793. <https://doi.org/10.1038/s41396-018-0083-3>
- Parks DH, Rinke C, Chuvochina M, Chaumeil PA, Woodcroft BJ, Evans PN, Hugenholtz P, Tyson GW (2017) Recovery of nearly 8,000 metagenome-assembled genomes substantially expands the tree of life. *Nat Microbiol* 2(11):1533–1542. <https://doi.org/10.1038/s41564-017-0012-7>
- Pinto AM, Marcus DN, Ijaz UZ, Bautista-de Iose Santos QMB, Dick GJ, Raskin L (2015) Metagenomic evidence for the presence of comammox *Nitrospira*-like bacteria in a drinking water system. *mSphere* 1(1):e00054-15. <https://doi.org/10.1128/mSphere.00054-15>

- Slaby BM, Hackl T, Horn H, Bayer K, Hentschel U (2017) Metagenomic binning of a marine sponge microbiome reveals unity in defense but metabolic specialization. *ISME J* 11(11):2465–2478. <https://doi.org/10.1038/ismej.2017.101>
- Speth DR, in 't Zandt MH, Guerrero-Cruz S, Dutilh BE, Jetten MSM (2016) Genome-based microbial ecology of anammox granules in a full-scale wastewater treatment system. *Nat Commun* 7:10. <https://doi.org/10.1038/ncomms11172>
- Ushiki N, Fujitani H, Shimada Y, Morohoshi T, Sekiguchi Y, Tsuneda S (2018) Genomic analysis of two phylogenetically distinct *Nitrospira* species reveals their genomic plasticity and functional diversity. *Front Microbiol* 8(2637). <https://doi.org/10.3389/fmicb.2017.02637>
- van Kessel MAHI, Speth DR, Albertsen M, Nielsen PH, Op den Camp HJM, Kartal B, Jetten MSM, Lücker S (2015) Complete nitrification by a single microorganism. *Nature* 528(7583):555–559. <https://doi.org/10.1038/nature16459>
- Wang YL, Ma LP, Mao YP, Jiang XT, Xia Y, Yu K, Li B, Zhang T (2017) Comammox in drinking water systems. *Water Res* 116:332–341. <https://doi.org/10.1016/j.watres.2017.03.042>
